# Supplementary material for: High-performance artificial synapses based on two-dimensional MoSe2 powder with Se vacancies
Source: Royal Society of Chemistry journal article supplement (doi:10.1039/d4tc00396a), 2024-01-01
Supplement: d4tc00396a1.pdf [file d4tc00396a1.pdf]

### Supplemental material

High-performance artificial synapse based on two-dimensional MoSe<sub>2</sub> powder with Se vacancy

Xinci Chen,<sup>a</sup> Li Deng,<sup>a</sup> Feifei Luo,<sup>a</sup> Yanzhao Wu,<sup>a</sup> Fubo Tian,<sup>b</sup> Xianmin Zhang<sup>a\*</sup>

<sup>a</sup>Key Laboratory for Anisotropy and Texture of Materials (Ministry of Education), School of Material Science and Engineering, Northeastern University, Shenyang, 110819, China

<sup>b</sup>State Key Laboratory of Superhard Materials, College of Physics, Jilin University, Changchun, 130012, China

\*Corresponding email: [zhangxm@atm.neu.edu.cn](mailto:zhangxm@atm.neu.edu.cn)

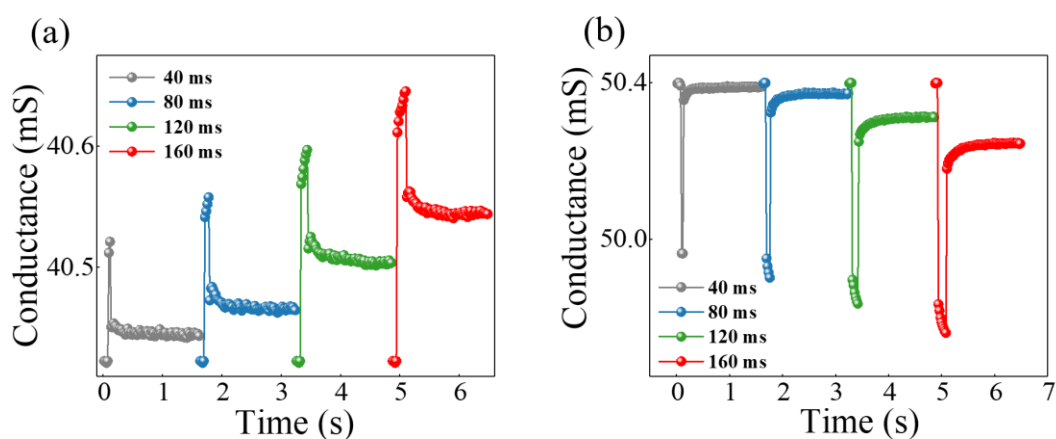

Figure S1. The conductance response of MoSe<sub>2</sub> device with different pulse widths (40-160 ms) under (a) 1.5 V and (b) -1.5 V pulse voltages.
